# Supplementary material for: First-principles investigation of nonmetal doped single-layer BiOBr as a potential photocatalyst with a low recombination rate
Source: Royal Society of Chemistry journal article supplement (doi:10.1039/d0cp02007a), 2020-01-01
Supplement: d0cp02007a1.pdf [file d0cp02007a1.pdf]

## Supporting Information (SI)

### First-Principles Investigation of Nonmetal Doped Single-Layer BiOBr as a Potential Photocatalyst with Low Recombination Rate

Mohammed M. Obeid,<sup>\*a</sup> C. Stampfl<sup>b</sup>, A. Bafekry<sup>c,d</sup>, Z. Guane<sup>e</sup>, H. R. Jappor<sup>f</sup>, C. V. Nguyen<sup>g</sup>, M. Naseri<sup>h</sup>, D. M. Hoat<sup>i</sup>, N. N. Hieu<sup>j,k</sup>, A. E. Krauklis<sup>l</sup>, T. V. Vu<sup>m</sup> and D. Gogova<sup>n</sup>

<sup>a</sup>Department of Ceramics, College of Materials Engineering, University of Babylon, 51002, Hilla, Iraq.

<sup>b</sup>School of Physics, The University of Sydney, New South Wales, 2006, Australia.

<sup>c</sup>Department of Physics, University of Guilan, 41335-1914 Rasht, Iran

<sup>d</sup>Department of Physics, University of Antwerp, Groenenborgerlaan 171, B-2020, Antwerp, Belgium

<sup>e</sup>School of Chemistry and Chemical Engineering, Shandong University, Jinan 250100, P. R. China

<sup>f</sup>Department of Physics, College of Education for Pure Sciences, University of Babylon, Hilla, Iraq

<sup>g</sup>Department of Materials Science and Engineering, Le Quy Don Technical University, Ha Noi 100000, Vietnam

<sup>h</sup>Department of Physics, Kermanshah Branch, Islamic Azad University, P.O. Box 6718997551, Kermanshah, Iran

<sup>i</sup>Computational Optics Research Group, Advanced Institute of Materials Science, Ton Duc Thang University, Ho Chi Minh City, Viet Nam

<sup>j</sup>Institute of Research and Development, Duy Tan University, Da Nang, Viet Nam

<sup>k</sup>Faculty of Natural Sciences, Duy Tan University, Da Nang 550000, Viet Nam

<sup>l</sup>SINTEF, Department of Materials and Nanotechnology, 0314 Oslo, Norway

<sup>m</sup>Division of Computational Physics, Institute for Computational Science, Ton Duc Thang University, Ho Chi Minh City, Viet Nam

<sup>n</sup>Department of Physics, University of Oslo, P.O. Box 1048, Blindern, Oslo, Norway

\* To whom correspondence should be addressed.

Email: [m.obeid8686@gmail.com](mailto:m.obeid8686@gmail.com)

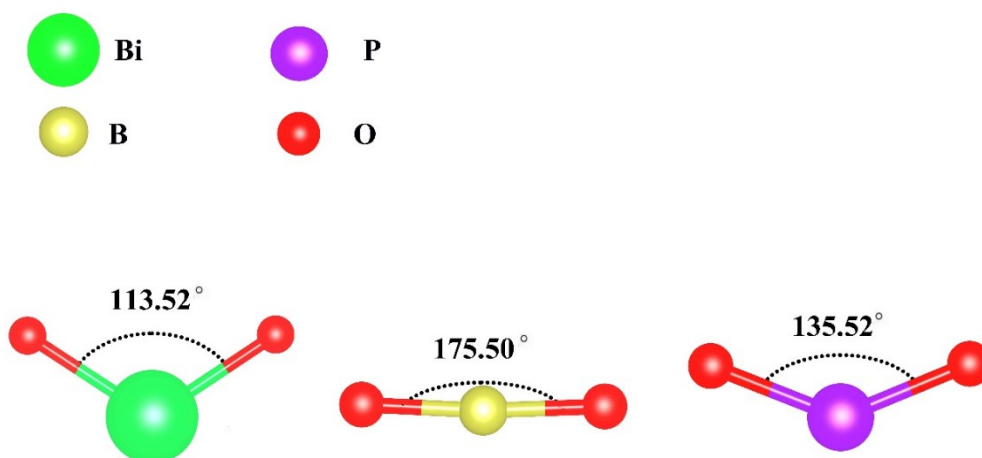

**Fig. S1** The optimized bond angle for (a) O-Bi-O, (b) O-B-O, and (c) O-P-O, respectively. The green, golden, purple, and red spheres represent Bi, B, P, and O atoms, respectively.

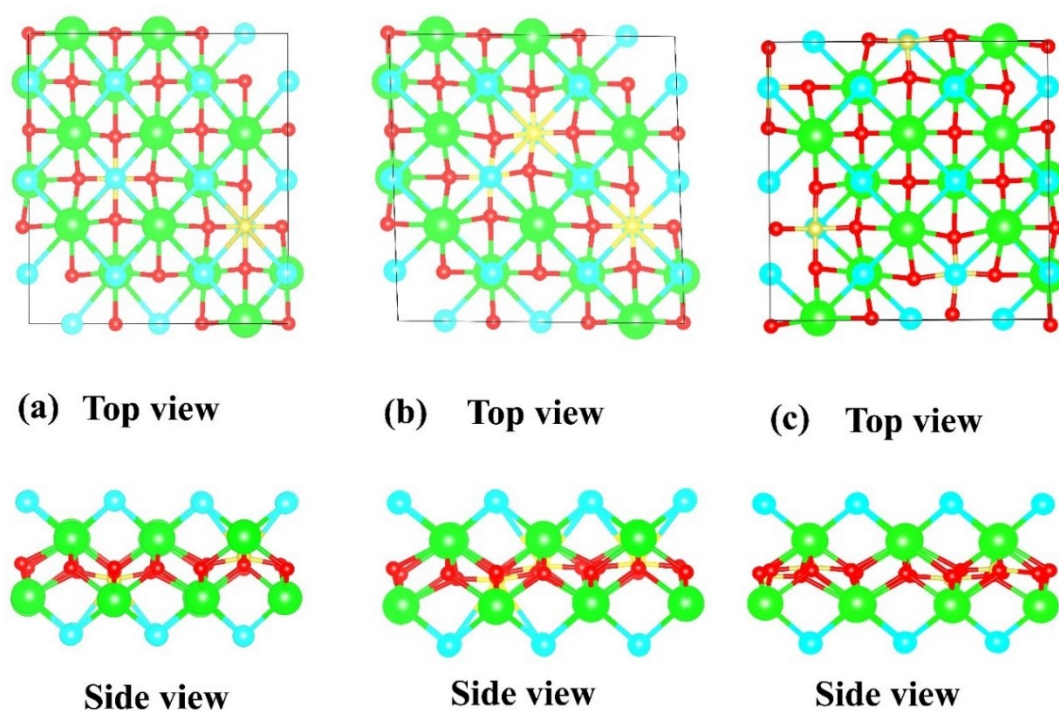

**Fig. S2** Optimized atomic structures of B-doped single-layer BiOBr with the B atoms substituting (a) two Bi atoms, (b) three Bi atoms, and (c) four Bi atoms. The green, golden, red, and cyan spheres represent Bi, B, O, and Br atoms, respectively.

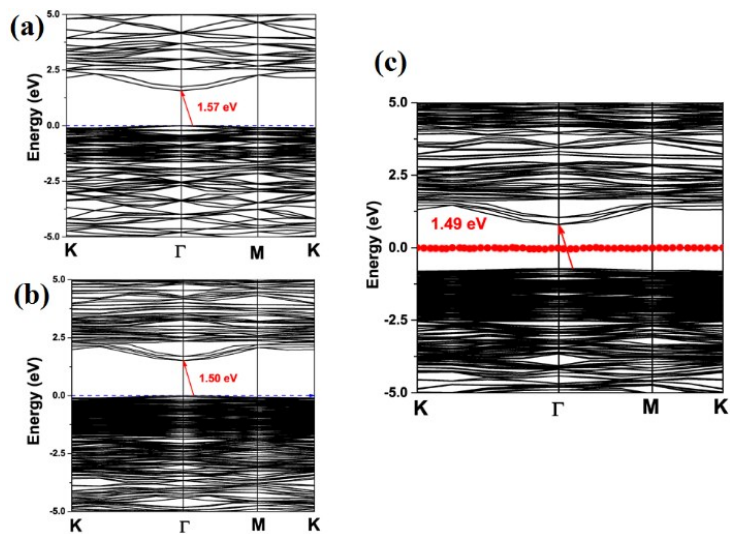

**Fig. S3** Electronic band structure of pristine BiOBr layer (a), SubB (b), and SubP (c) systems using PBE-SOC. The horizontal dashed blue line signifies the Fermi level which is set to zero.

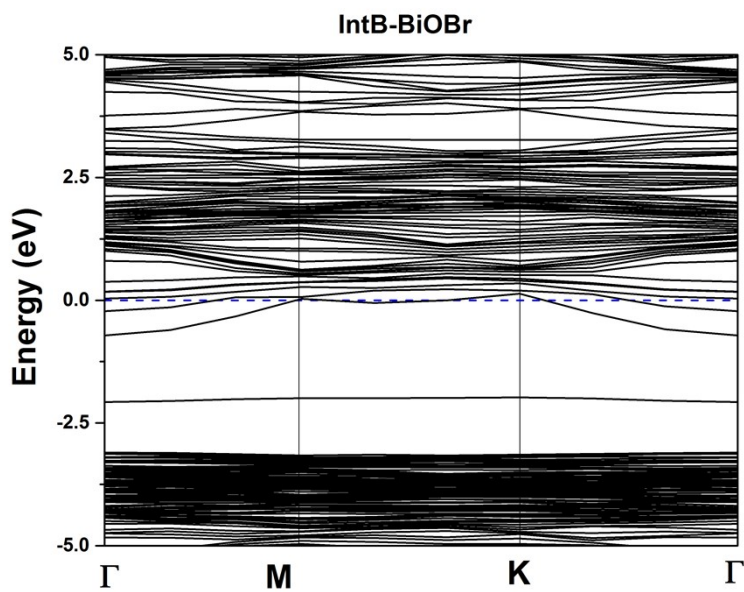

**Fig. S4** Electronic band structure of interstitial B doped BiOBr layer. The horizontal dashed blue line signifies the Fermi level which is set to zero.

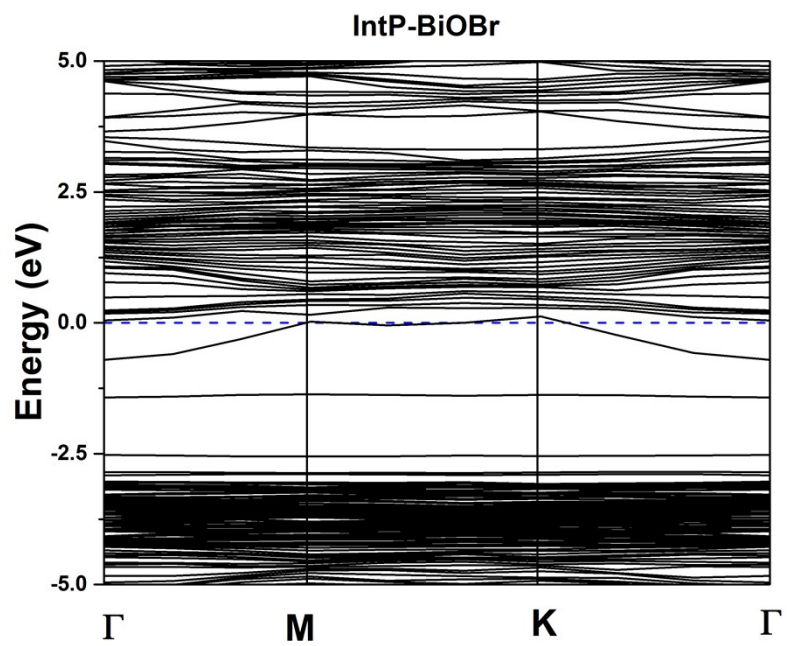

**Fig. S5:** Electronic band structure of interstitial P doped BiOBr layer. The horizontal dashed blue line signifies the Fermi level which is set to zero.

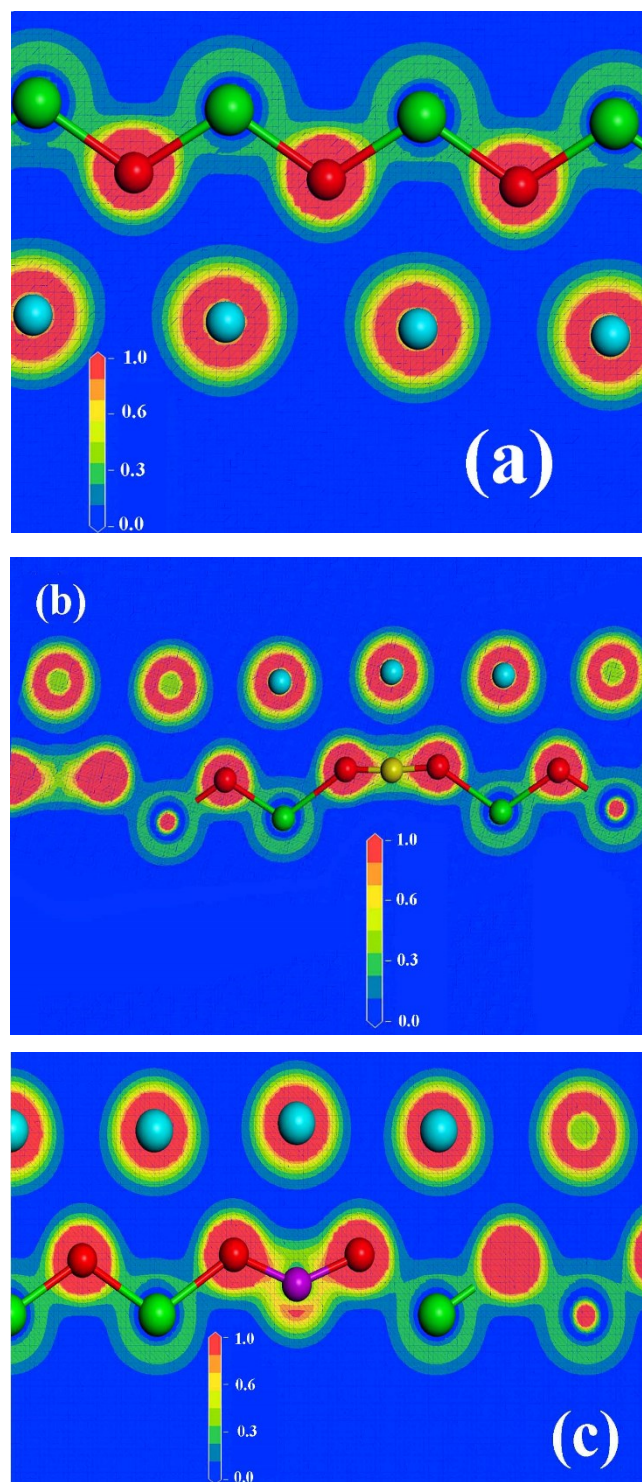

**Fig. S6** The electron density distribution of pristine BiOBr (a), and boron (b) and phosphorus (c) substituted single-layer BiOBr. The green, golden, purple, red, and cyan spheres represent Bi, B, P, O, and Br atoms, respectively.

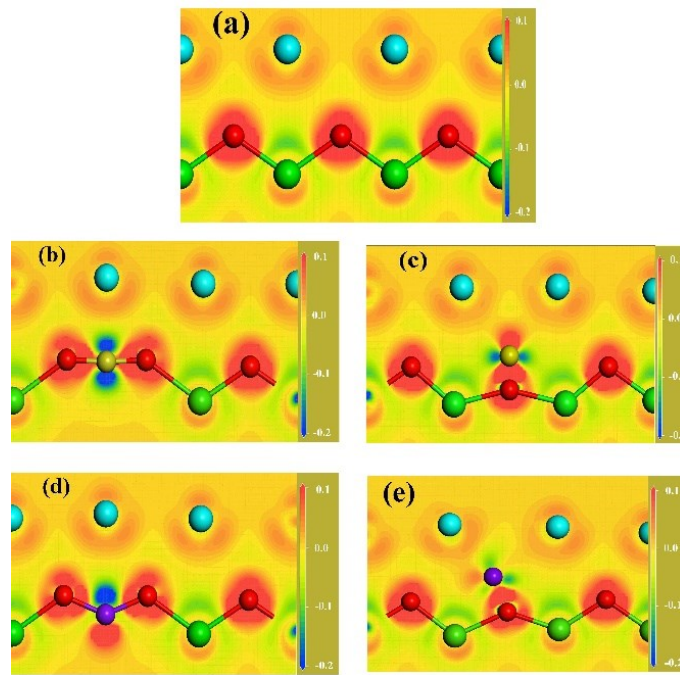

**Fig. S7** The corresponding charge density difference of (a) pristine, (a)  $B_{Sub}$ , (b)  $B_{Inter}$ , (c)  $P_{Sub}$ , and (d)  $P_{Inter}$  doped single-layer BiOBr. The color scale runs from -0.2 at bottom (blue) to +0.1 electrons/ $\text{\AA}^3$  at the top (red). The green, golden, purple, red, and cyan spheres represent Bi, B, P, O, and Br atoms, respectively.
